# Supplementary material
Source: PubMed Central journal article supplement (PMC4754048)
Supplement: supp_ddv627_ddv627supp.pdf [file supp_ddv627_ddv627supp.pdf]

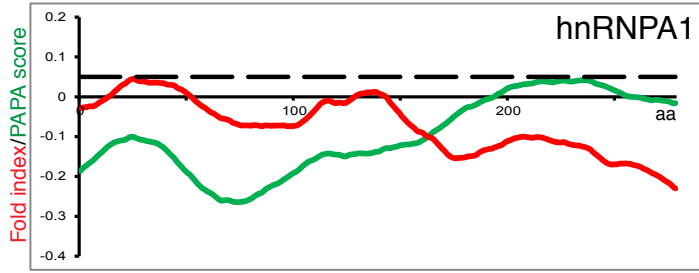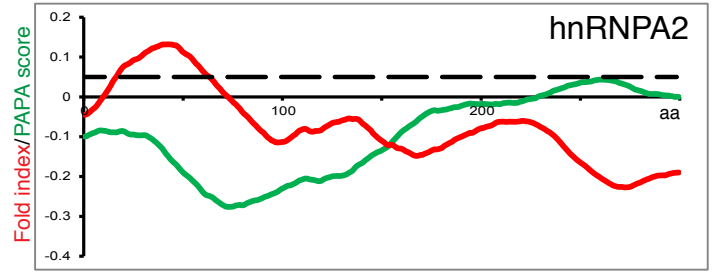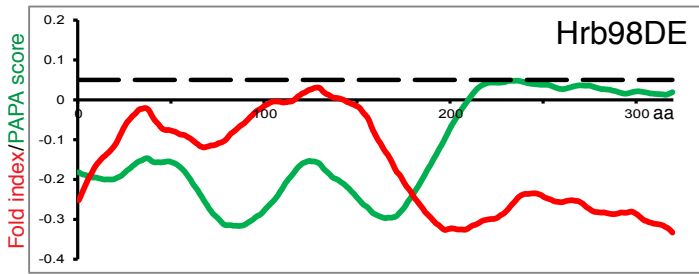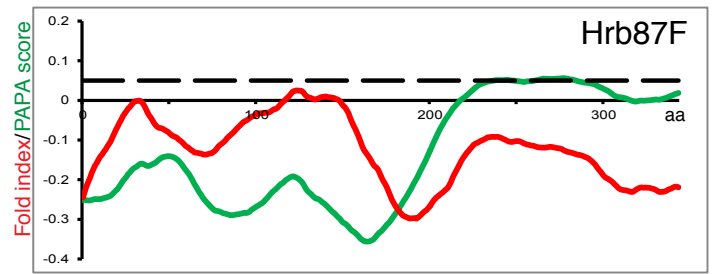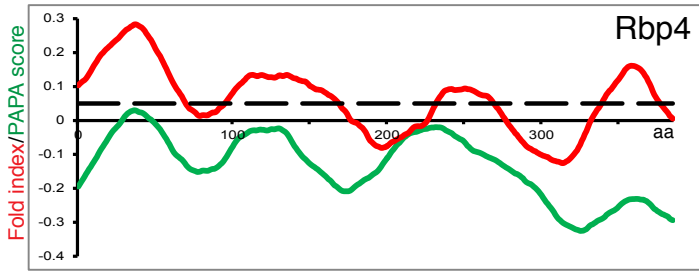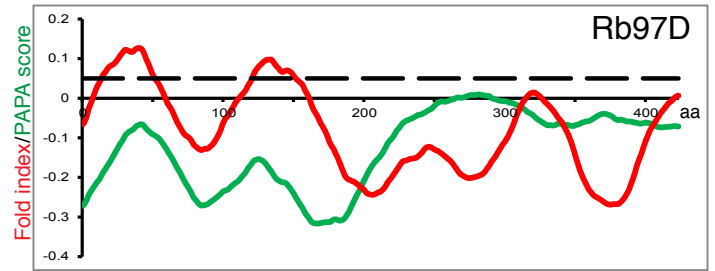

**Figure S1.** PAPA scores and fold indexes of human and *Drosophila* proteins that are homologous to hnRNPA2B1 and A1.

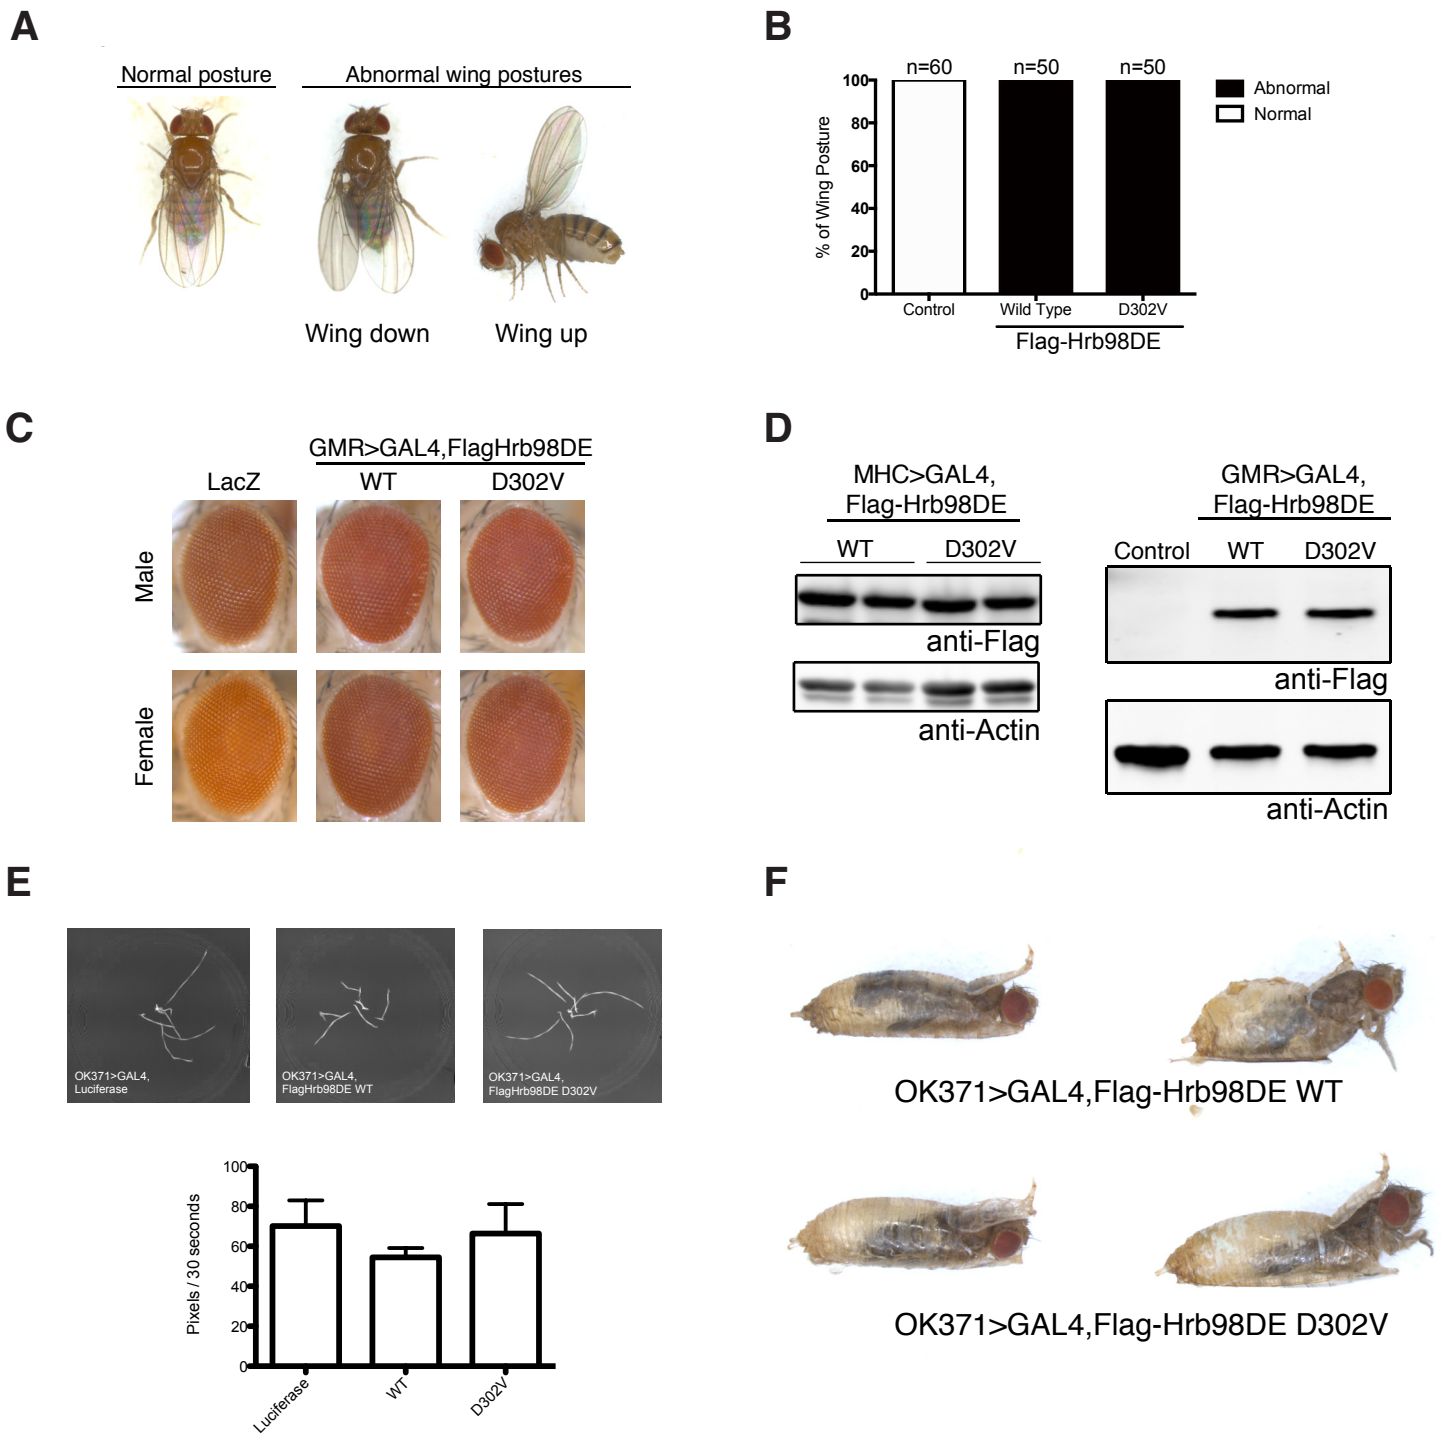

**Figure S2. Characterization of Hrb98DE WT and D302V phenotypes in *Drosophila* muscle, eye and motor neuron.** (A) Examples of abnormal wing postures caused by Hrb98DE expression in *Drosophila* under control of the MHC-GAL4. (B) Quantification of (A). Ectopic expression of Flag-Hrb98DE in *Drosophila* indirect flight muscle caused 100% abnormal wing-up or wing-down posture phenotype. (C) Flag-Hrb98DE WT or D302V was expressed in adult *Drosophila* eyes under control of the GMR-GAL4 promoter. The eyes did not show abnormal phenotype. (D) Western blotting assays show protein expression levels of Flag-Hrb98DE WT or D302V in *Drosophila* muscle and eye. (E) Locomotor (Crawling assay) was evaluated in 3rd instar larvae expressing Flag-Hrb98DE WT and D302V under the control of the OK371-GAL4 promoter. No significant difference was detected between the control and experiment groups. (F) Late pupal lethality was detected in *Drosophila* expressing Flag-Hrb98DE WT or D302V under control of the OK371-GAL4 promoter. Almost 100% of flies died when trying to leave the pupal case.

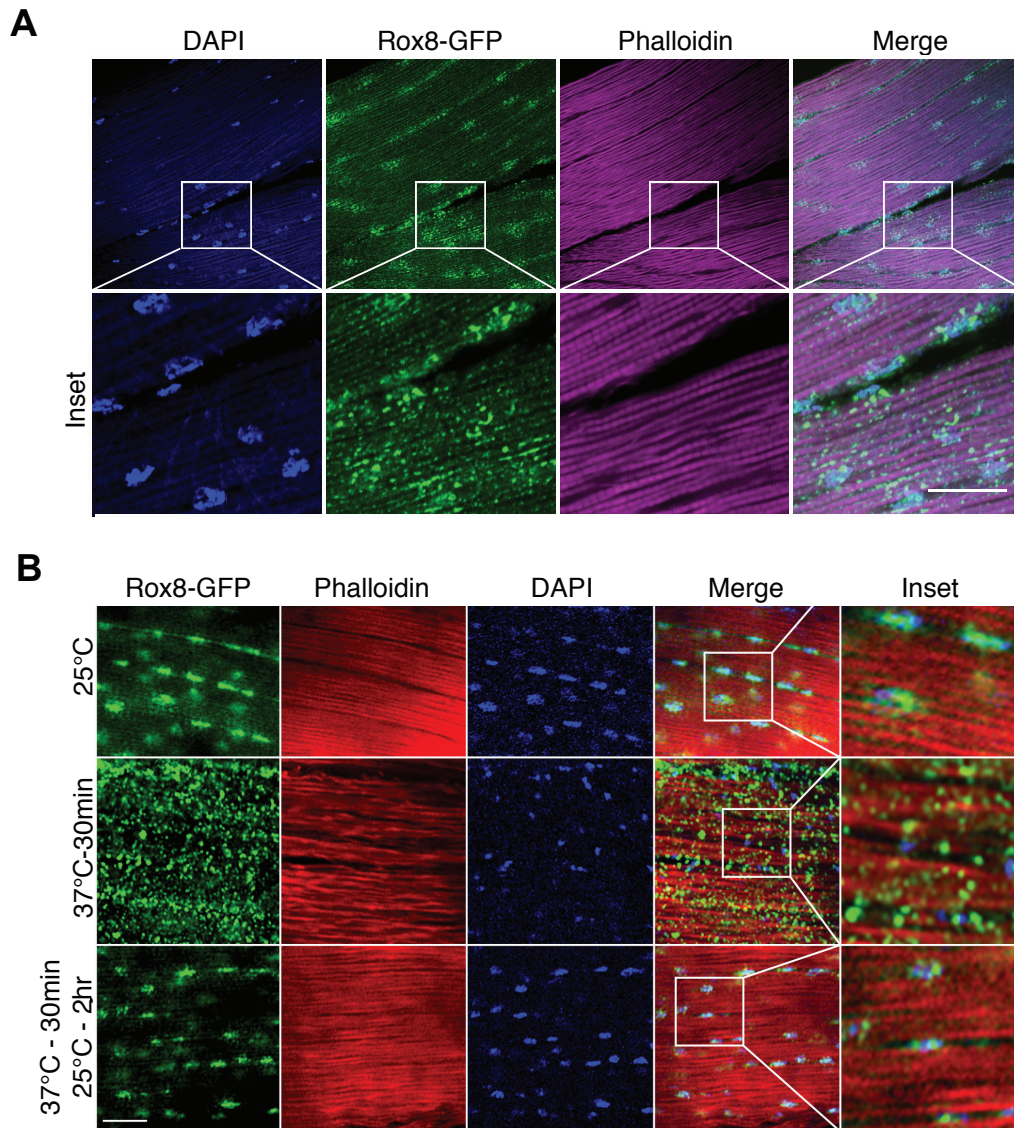

**Figure S3. Generation and characterization of flies expressing Rox8-GFP in adult indirect flight muscle.** (A) Ectopic expression of ROX8-GFP under the control of the Mhc-GAL4 promoter showed a granulated pattern that was mostly located in the cytoplasm, with enrichment in the para-nuclear area. (B) Formation of the heat shock-induced ROX8 aggregates in Mhc-GAL4>ROX8-GFP *Drosophila* showed stress granule-like behavior in the indirect flight muscle. Scale bars in A and B, 20  $\mu$ m.

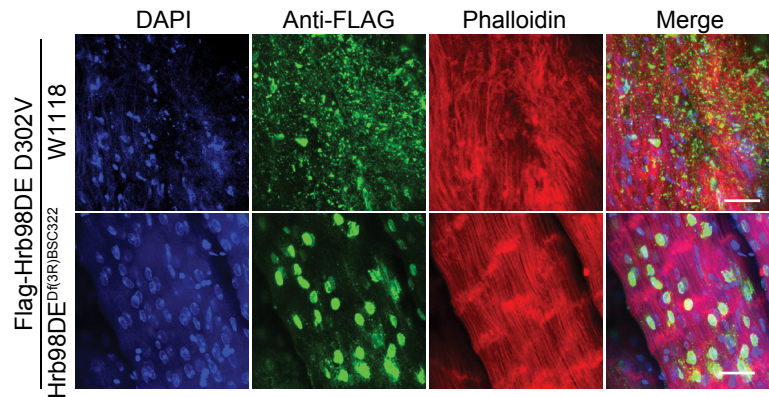

**Figure S4. Knockdown of endogenous Hrb98DE partially rescues cytoplasmic inclusions generated by Hrb98DE D302V.** Muscle from day 5 adult *Drosophila* expressing FLAG-Hrb98DE D302V was dissected to examine the cellular localization of the mutant protein. FLAG-Hrb98DE D302V was localized primarily in cytoplasmic inclusions (top). When endogenous Hrb98DE protein is knocked down using the classical allele Df(3R)BSC322, this partially rescues the localization of FLAG-Hrb98DE D302V into cytoplasmic inclusions (bottom). FLAG-Hrb98DE D302V was visualized with anti-FLAG antibody (green), DAPI was used to visualize the nucleus (blue) and a phalloidin stain was used to mark the muscle morphology (red). Size bars, 20  $\mu$ m.

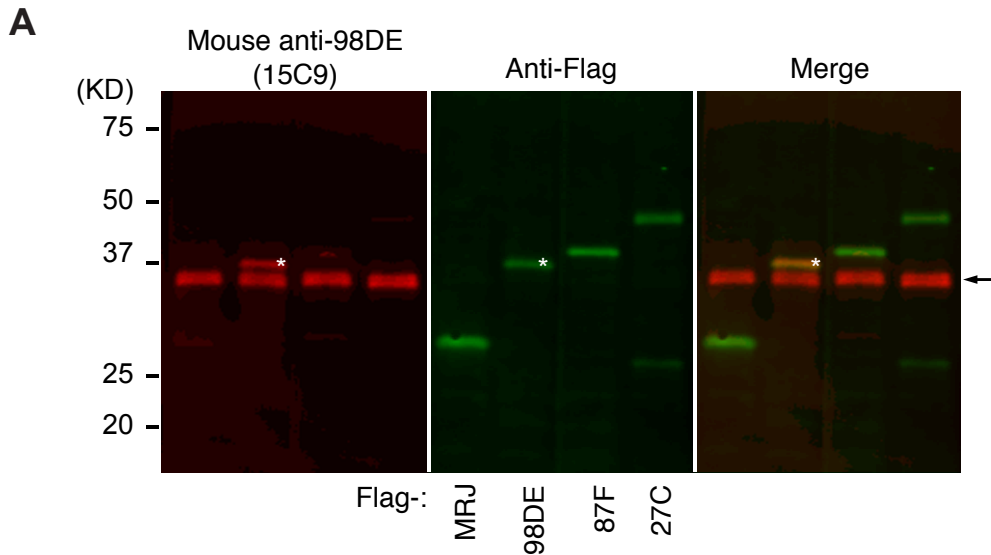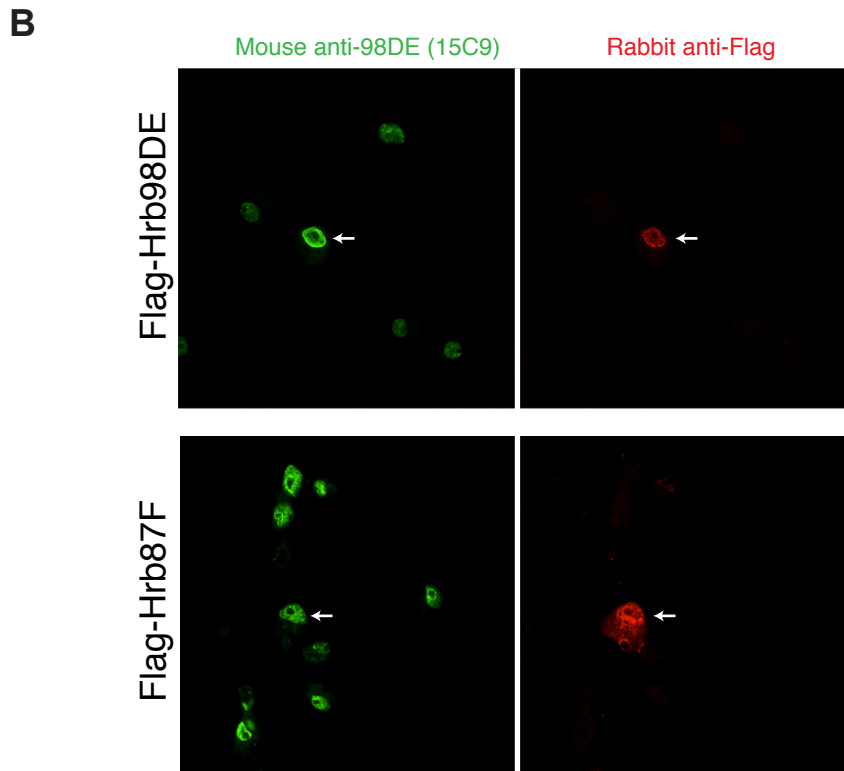

**Figure S5. Generation and characterization of anti-Hrb98DE monoclonal antibody (15C9).**

(A) Western blot assays showing the specificity of 15C9. S2 cell lysates prepared from cells transfected with Flag-MRJ, Flag-Hrb98DE, Flag-Hrb87F, or Hrb27C were used to perform immunofluorescence-based western blot assays. Mouse 15C9 (red) and rabbit anti-Flag (green) antibodies were used to detect corresponding protein on the same membrane.

(B) Indirect immunofluorescence (IIF) showing the specificity of 15C9. S2 cells transfected with either Flag-Hrb98DE (upper panels) or Flag-Hrb87F (lower panels) were attached to slides by cytopsin and then IIF was performed. Mouse 15C9 (green) and rabbit anti-Flag (red) were used to detect the corresponding proteins in cells.

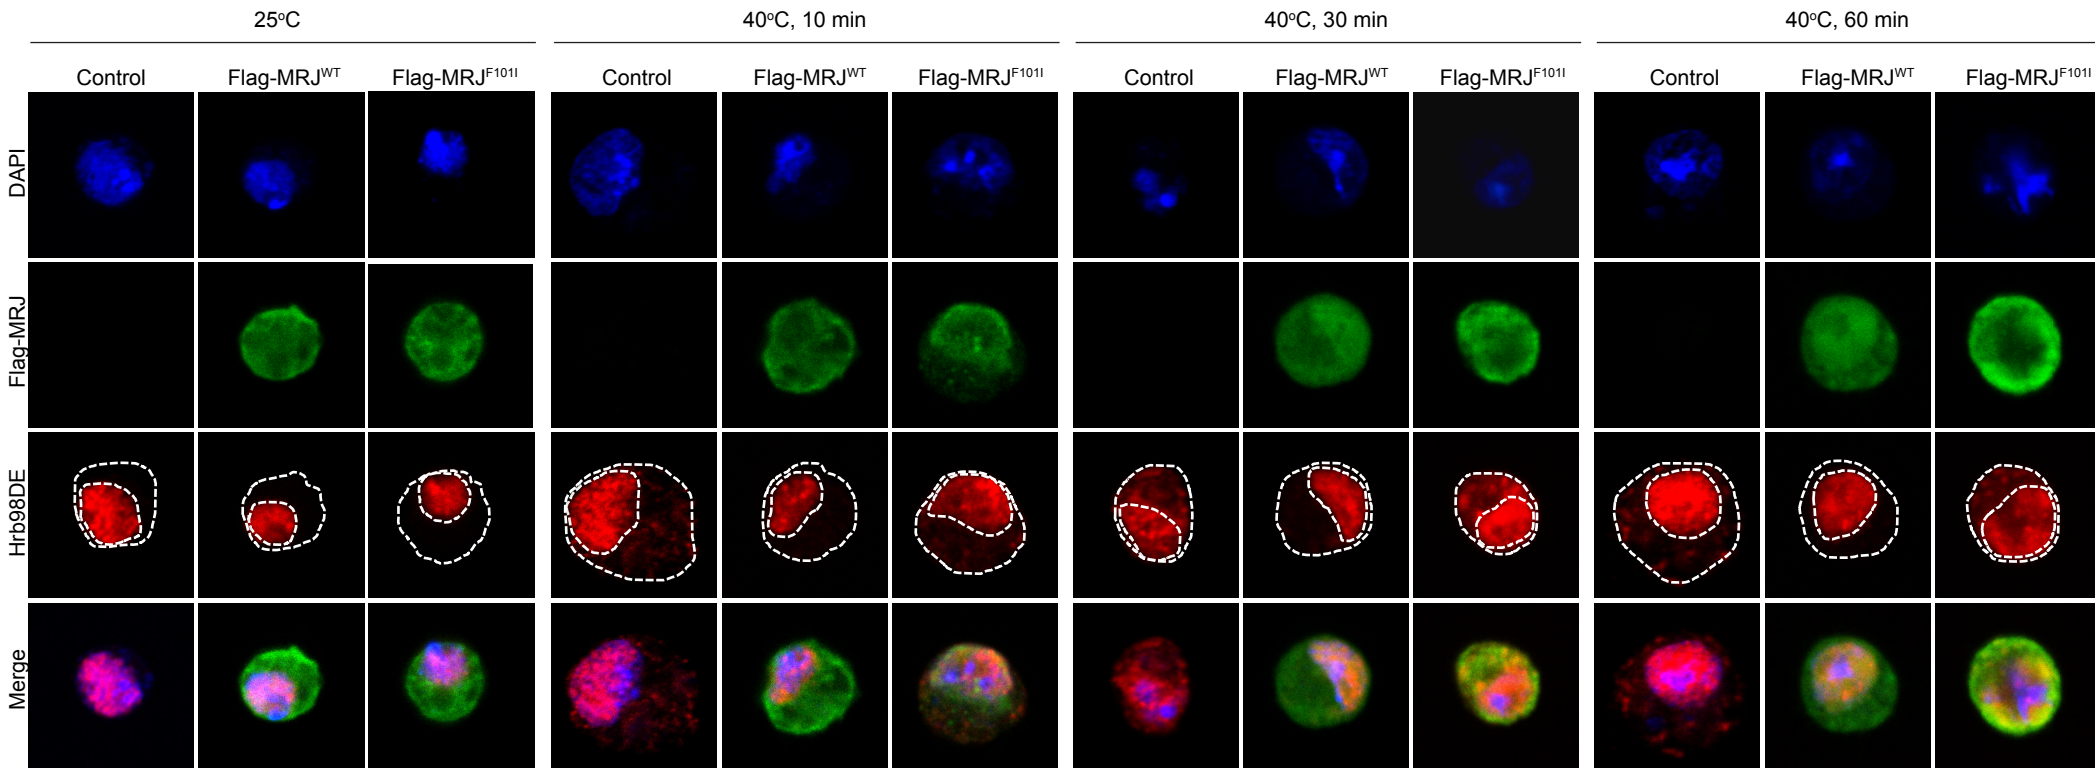

**Figure S6. Endogenous Hrb98DE is re-localized to cytoplasmic punta after heat shock and MRJ WT, not LGMD1E-associated mutant F101I, expression inhibits re-localization of Hrb98DE.** S2 cells transfected with either Flag-MRJ WT or F101I mutant were fixed before or after 40°C heat shock and stained with anti-Flag (green) and anti-Hrb98DE (red) to determine the cellular localization of these proteins.

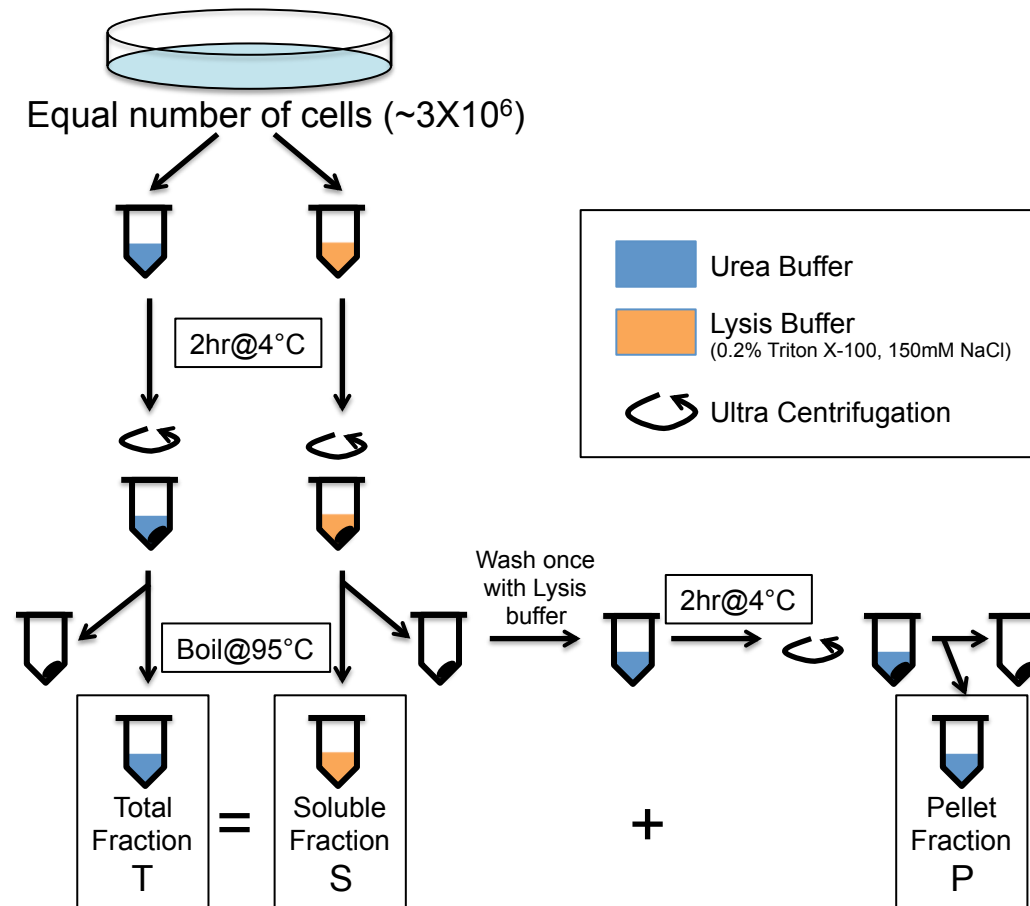

**Figure S7. Schematics for Protein Fractionation Assay.** Twenty-four hours post transfection, the total cell harvest was split 50:50 and the first fraction was lysed in Urea buffer and defined as total protein (T). The second fraction underwent sequential solubilization with 0.2% Triton X-100 followed by urea, and these were defined a soluble (S) and insoluble pellet (P).

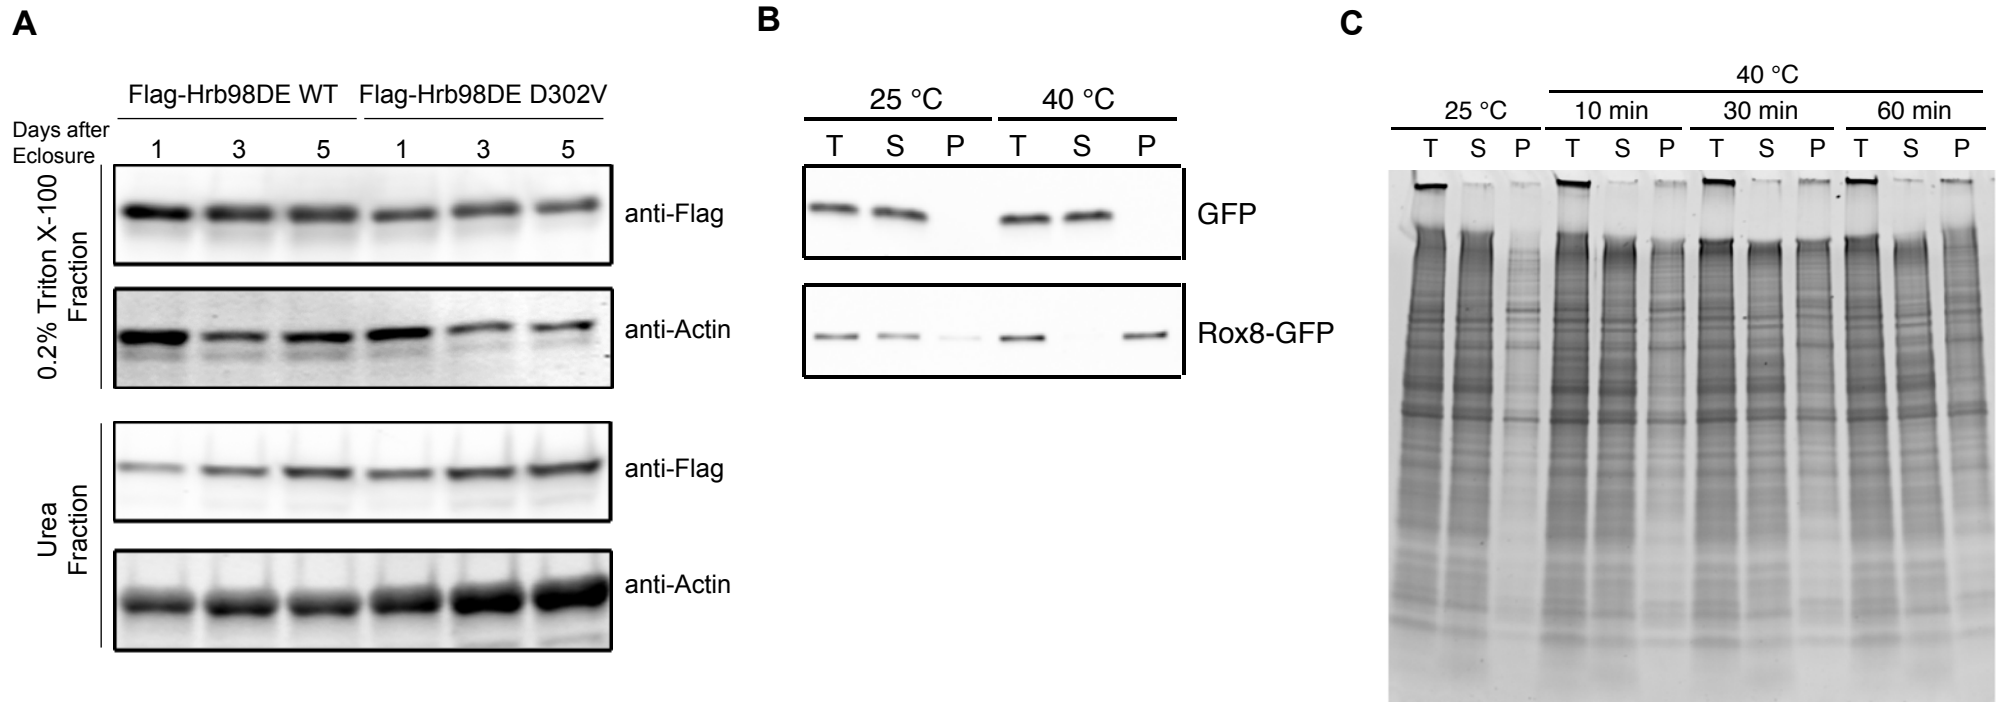

**Figure S8. Protein solubility after fractionation assay.** (A) Thoraces of adult flies were dissected and sequential extractions were performed to examine the solubility profile of Flag-Hrb98DE WT and D302V. Result shows that mutant Hrb98DE is less soluble than WT protein and greater amounts of mutant Hrb98DE are recovered in the Triton X-100 insoluble fraction. (B) S2 cells were transfected with either GFP or Rox8-GFP and cell lysates were fractionated before and after heat shock at 40 °C. Total (T), detergent-soluble (S), and insoluble pellet (P) fractions were blotted with anti-GFP antibody. (C) After a fractionation assay as described in Figure 7D, cell lysates were loaded onto the SDS-PAGE gel and stained with Sypro Ruby to visualize the total proteins loaded.
